# Supplementary material for: Discovery of a highly potent novel rifampicin analog by preparing a hybrid of the precursors of the antibiotic drugs rifampicin and clofazimine
Source: Springer Nature journal article supplement (doi:10.1038/s41598-020-80439-2), 2021-01-13
Supplement: MOESM1 [file 41598_2020_80439_MOESM1_ESM.pdf]

## **Supplementary Information for**

### **Discovery of a Highly Potent Novel Rifampicin analog by preparing a Hybrid of the Precursors of the antibiotic drugs Rifampicin and Clofazimine**

Pasupathy Saravanan <sup>a,1</sup>, V.N. Azger Dusthacker <sup>a</sup>, R.S. Rajmani <sup>b</sup>, B. Mahizhaveni <sup>a</sup>, Christy R. Nirmal <sup>a</sup>, Sam Ebenezer Rajadas <sup>a</sup>, Neerupma Bharadwaj <sup>b</sup>, C. Ponnuraja <sup>a</sup>, Adhin Bhaskar <sup>a</sup>, A.K. Hemanthkumar <sup>a</sup>, Geetha Ramachandran <sup>a</sup>, and Srikanth P. Tripathy <sup>a,1</sup>.

<sup>1</sup> To whom correspondence may be addressed.

**Email:** saran2k5@gmail.com or srikanthtripaty@gmail.com

#### **This supplementary file includes:**

Figures S1 to S5

# Spectrum Plot Report

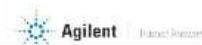

|                |                        |              |                        |            |              |                   |                     |
|----------------|------------------------|--------------|------------------------|------------|--------------|-------------------|---------------------|
| Name           | 050919-13-EXT-R-PHE-77 | Rack Pos.    |                        | Instrument | Instrument 1 | Operator          |                     |
| Inj. Vol. (ul) | 5                      | Plate Pos.   |                        | IRM Status | Success      | Acq. Time (Local) | 05-09-2019 12:41:32 |
| Data File      | R-PHE-77.d             | Method (Acq) | Direct Infusion_HPLC.m | Comment    |              | (UTC+05:30)       |                     |

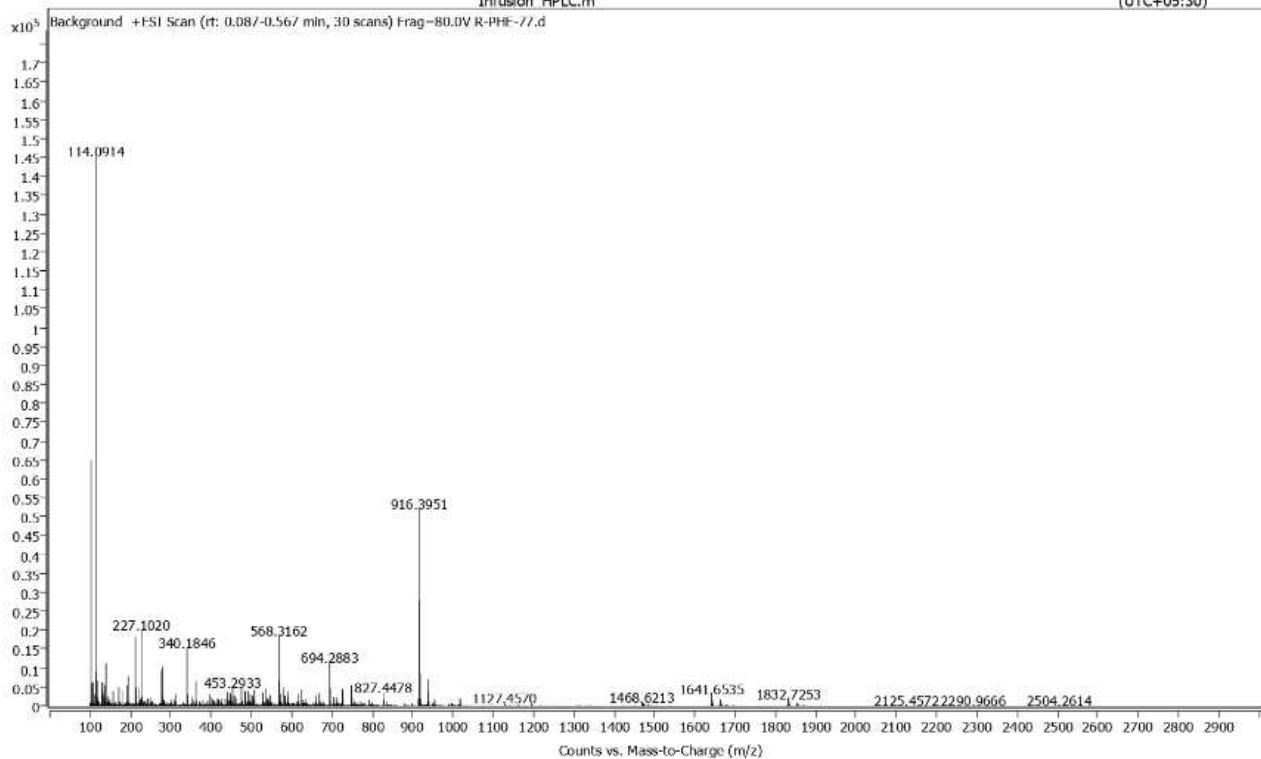

**Fig. S1.** HRMS spectrum of RPZ (5)

R-PHE-77.....Saravanan

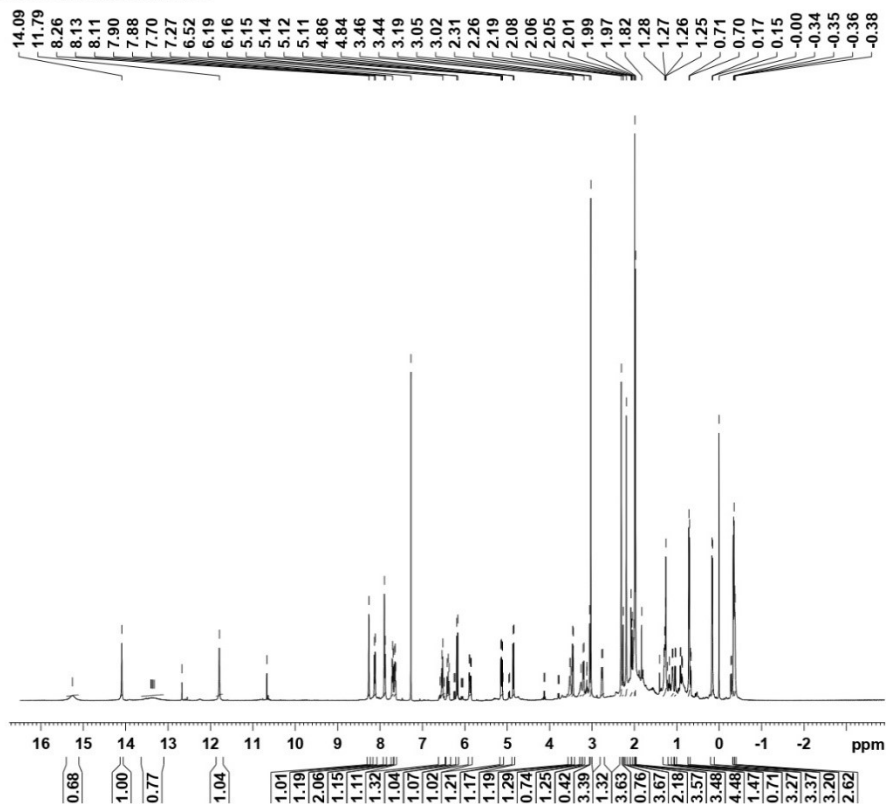

Current Data Parameters  
NAME Sep27-2019  
EXPNO 3  
PROCNO 1

F2 - Acquisition Parameters  
Date\_ 20190927  
Time 7.31  
INSTRUM spect  
PROBHD 5 mm PABBO BB-  
PULPROG zg30  
TD 32768  
SOLVENT CDCl3  
NS 32  
DS 2  
SWH 10330.578 Hz  
FIDRES 0.315264 Hz  
AQ 1.5859712 sec  
RG 203  
DW 48.400 usec  
DE 6.50 usec  
TE 295.7 K  
D1 1.00000000 sec  
TD0 1

==== CHANNEL f1 =====  
NUC1 1H  
P1 11.88 usec  
PL1 0 dB  
PL1W 23.53637505 W  
SFO1 500.1330885 MHz

F2 - Processing parameters  
SI 32768  
SF 500.1300084 MHz  
WDW EM  
SSB 0  
LB 0.30 Hz  
GB 0  
PC 1.00

Fig. S2. <sup>1</sup>H NMR Spectrum of RPZ (5)

R-77-PHE.....Saravanan

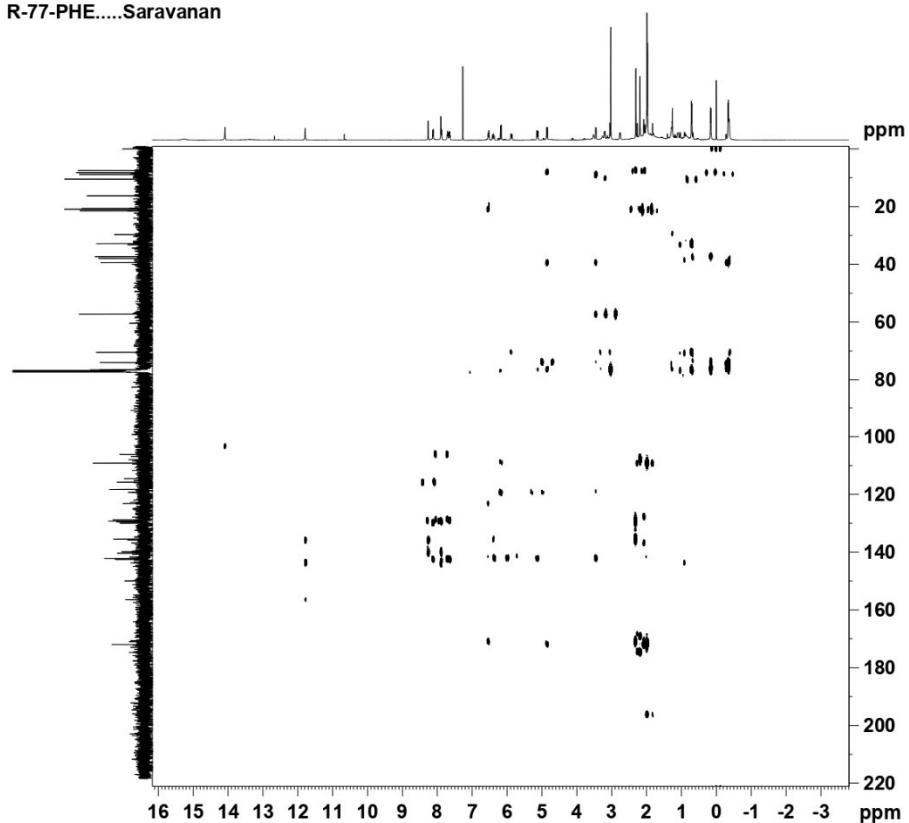

Current Data Parameters  
NAME Sep30-2019  
EXPNO 11  
PROCNO 1

F2 - Acquisition Parameters  
Date\_ 20190930  
Time 9.59  
INSTRUM spect  
PROBHD 5 mm PABBO BB-  
PULPROG hmbcgpndqf  
TD 4096  
SOLVENT CDCl3  
NS 16  
DS 16  
SWH 10000.000 Hz  
FIDRES 2.441406 Hz  
AQ 0.2048000 sec  
RG 203  
DW 50.000 usec  
DE 6.50 usec  
TE 295.4 K  
CNST13 8.0000000  
D0 0.00000300 sec  
D1 1.34844804 sec  
D6 0.06250000 sec  
D16 0.00020000 sec  
IN0 0.00001790 sec

==== CHANNEL f1 =====  
NUC1 1H  
P1 11.88 usec  
P2 23.76 usec  
PL1 0 dB  
PL1W 23.53637505 W  
SFO1 500.1330883 MHz

==== CHANNEL f2 =====  
NUC2 13C  
P3 7.80 usec  
PL2 0 dB  
PL2W 70.83519745 W  
SFO2 125.7716224 MHz

==== GRADIENT CHANNEL =====  
GPNAM[1] SINE.100  
GPNAM[2] SINE.100  
GPNAM[3] SINE.100  
GPZ1 50.00 %  
GPZ2 30.00 %

Fig. S3. HMBC Spectrum of RPZ (5)

R-PHE-77.....Saravanan

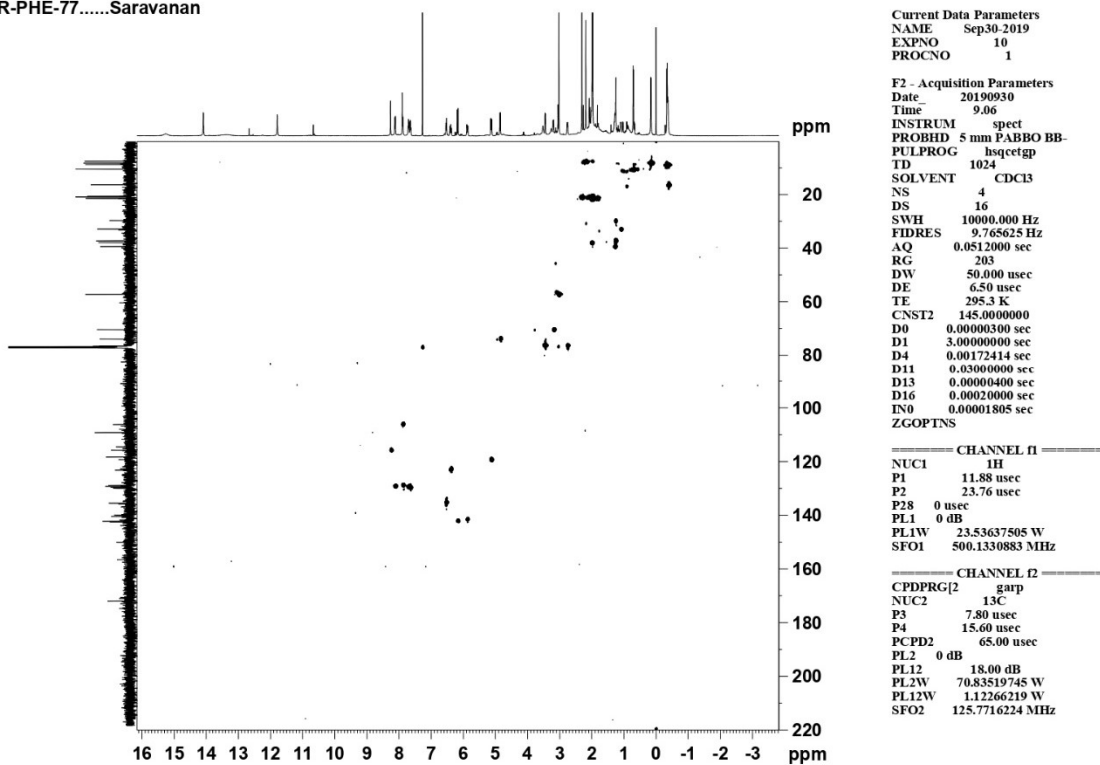

Fig. S4. HSQC Spectrum of RPZ (5)

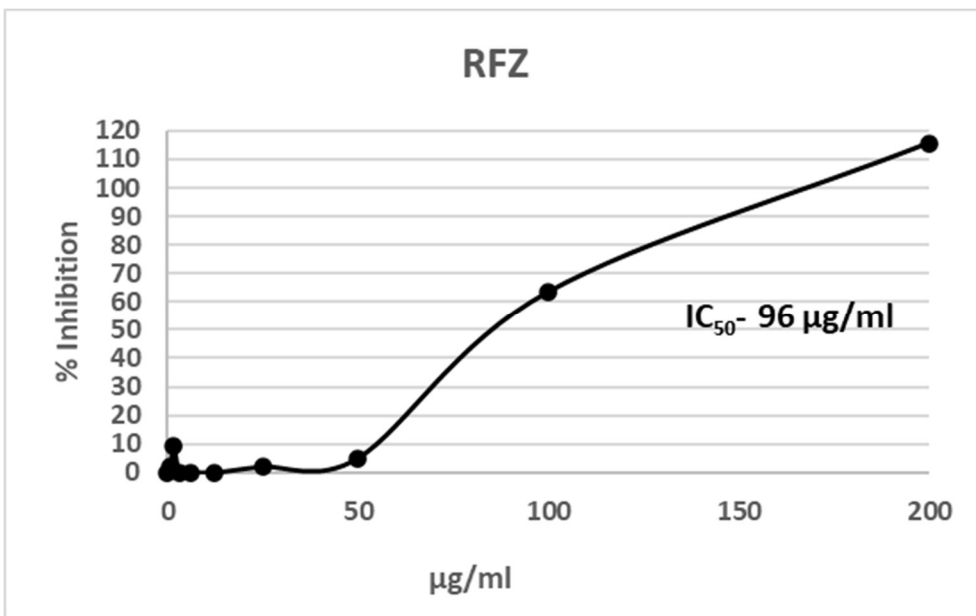

Fig. S5. Cytotoxicity (IC<sub>50</sub>) study of RPZ on human monocytic cell line THP-1
